# Supplementary material for: GWAS for serum galactose-deficient IgA1 implicates critical genes of the O-glycosylation pathway
Source: PLOS journal article supplement (doi:10.1371/journal.pgen.1006609), 2017-02-10
Supplement: S4 (10.1371/journal.pgen.1006609.s004) [file journal.pgen.1006609.s004]

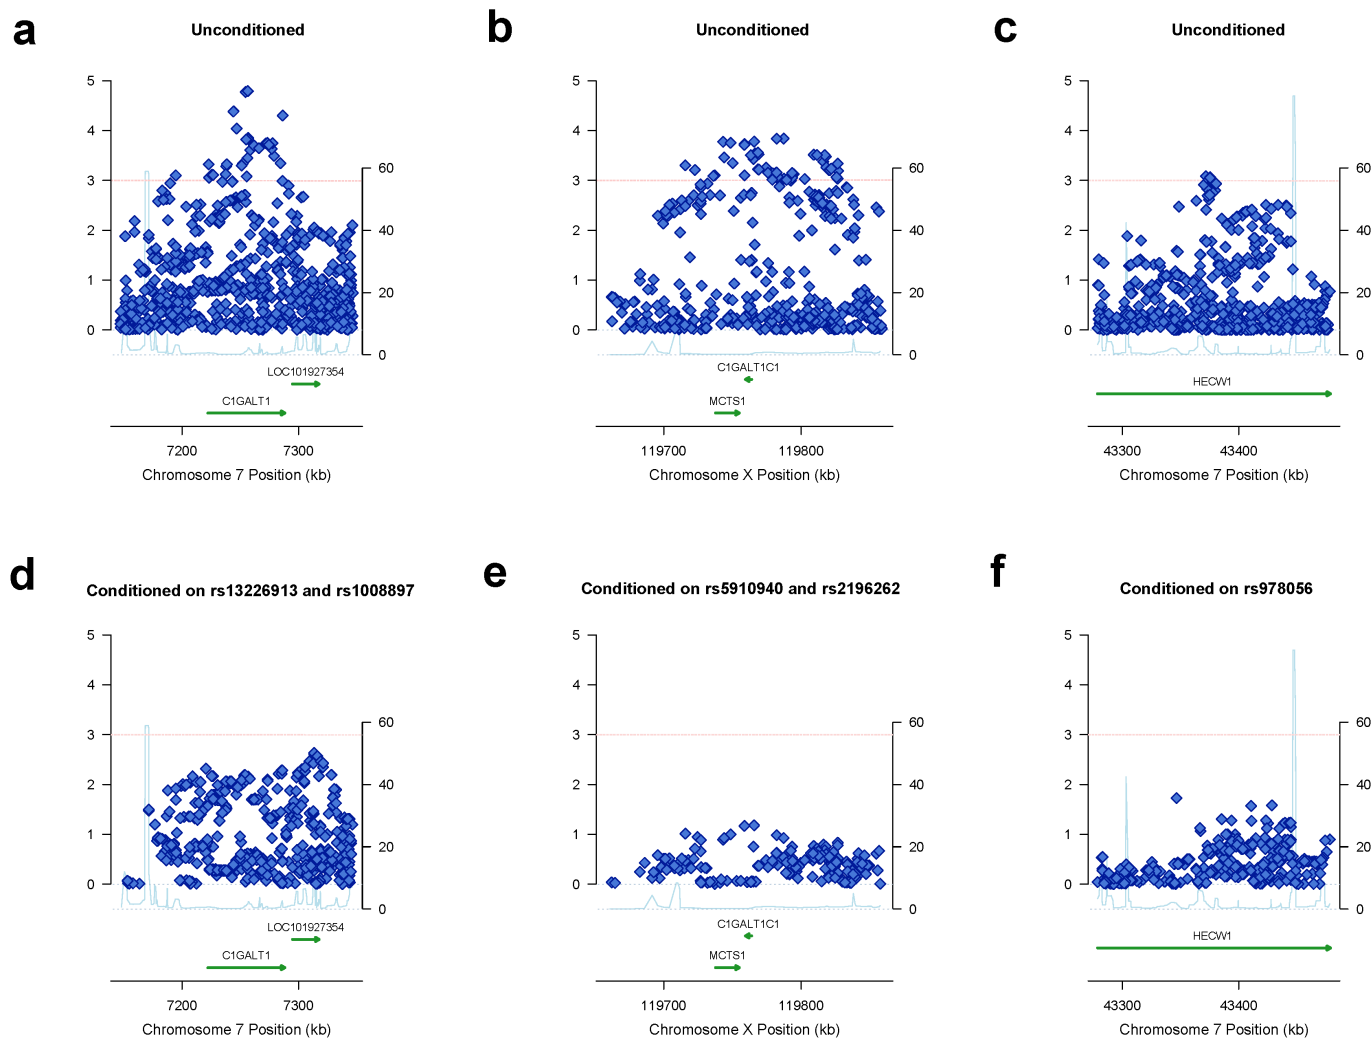

**Supplementary Figure 4.**

**Conditional analysis of the top three loci using all imputed markers (1000 Genomes reference, version 3).**

The top row depicts unconditioned discovery meta-analysis results for all the imputed markers at the (a) *C1GALT1*, (b) *C1GALT1C1*, and (c) *HECW1* loci. The bottom row depicts the discovery meta-analysis results after conditioning individual cohort results for the lead SNP(s) at each locus: (d) rs13226913 and rs1008897 at the *C1GALT1* locus, (e) rs5910940 and rs2196262 at the *C1GALT1C1* locus, and (f) rs978056 at the *HECW1* locus. The red dotted line corresponds to  $P = 1 \times 10^{-3}$  and is provided for reference.
