# Supplementary material for: GWAS for serum galactose-deficient IgA1 implicates critical genes of the O-glycosylation pathway
Source: PLOS journal article supplement (doi:10.1371/journal.pgen.1006609), 2017-02-10
Supplement: S9 (10.1371/journal.pgen.1006609.s009) [file journal.pgen.1006609.s009]

**Supplementary Table 4. Total variance explained by genome-wide significant loci.**

The fraction of total variance explained was estimated by regressing individual genetic predictors (additive coding) against the outcome of standardized residuals for the trait (Gd-IgA1 levels adjusted for age, case-control status, and serum total IgA levels) and deriving R<sup>2</sup> for the regression model. The total variance explained across multiple cohorts was calculated as an average fraction of explained variance for individual cohorts weighted by cohort size. The variance explained by the *C1GALT1* locus was calculated by including both rs13226913 and rs1008897 in the regression model. For *C1GALT1C1* locus, both rs5910940 and rs2196262 were included under additive coding. The total variance explained jointly by *C1GALT1* and *C1GALT1C1* loci was calculated by including all four SNP predictors from these loci in a single regression model.

| <b>Cohort(s)</b>            | <b>N</b>     | <b><i>C1GALT1</i> locus</b> | <b><i>C1GALT1C1</i> locus</b> | <b><i>C1GALT1+C1GALT1C1</i> loci</b> |
|-----------------------------|--------------|-----------------------------|-------------------------------|--------------------------------------|
| <b>Asian Discovery</b>      | 950          | 0.8%                        | 1.2%                          | 2.1%                                 |
| <b>Asian Replication</b>    | 653          | 1.0%                        | 1.1%                          | 2.0%                                 |
| <b>All Asians</b>           | <b>1,603</b> | <b>0.9%</b>                 | <b>1.2%</b>                   | <b>2.0%</b>                          |
| <b>European Discovery</b>   | 245          | 3.6%                        | 1.2%                          | 5.0%                                 |
| <b>European Replication</b> | 785          | 4.3%                        | 3.3%                          | 7.8%                                 |
| <b>All Europeans</b>        | <b>1,030</b> | <b>4.2%</b>                 | <b>2.8%</b>                   | <b>7.1%</b>                          |
| <b>All Cohorts</b>          | 2,633        | 2.2%                        | 1.8%                          | 4.0%                                 |
